# Supplementary material for: Daidzein alleviates osteoporosis by promoting osteogenesis and angiogenesis coupling
Source: PeerJ journal article supplement (doi:10.7717/peerj.16121), 2023-10-16

# Figure 4A

Control      5 $\mu$ M Daidzein      10 $\mu$ M Daidzein  
                 15min 30min 60min      15min 30min 60min

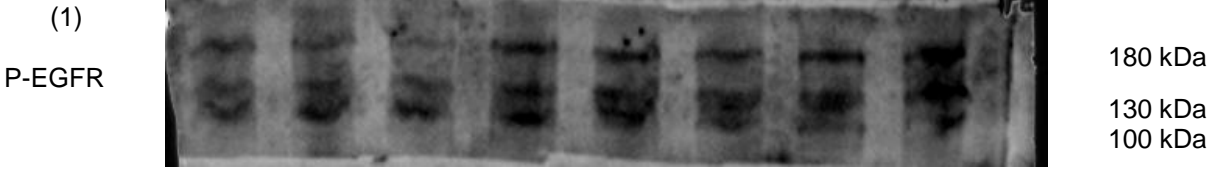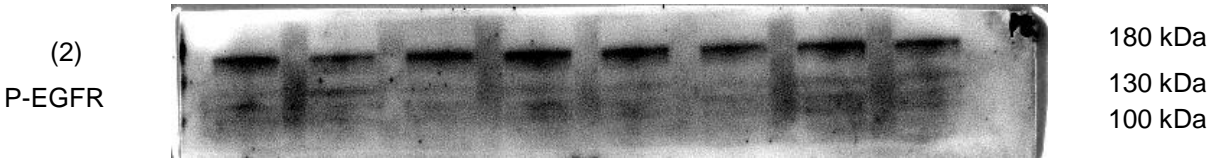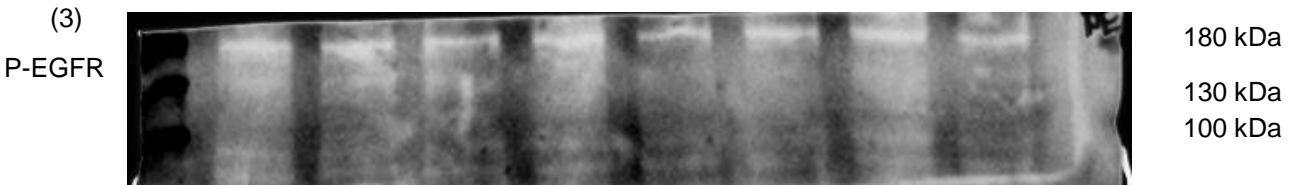

**Figure 4A**

Control      5 $\mu$ M Daidzein      10 $\mu$ M Daidzein  
15min   30min   60min   15min   30min   60min

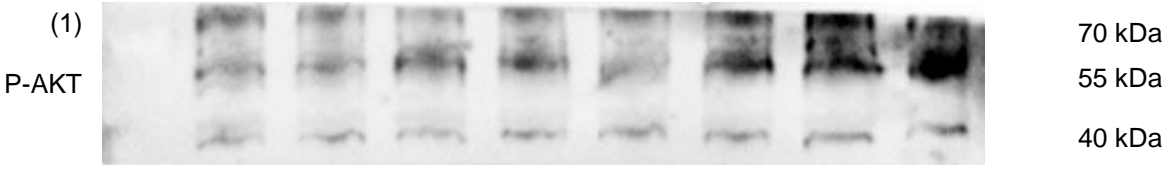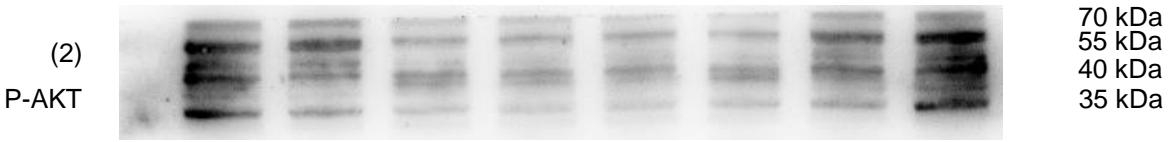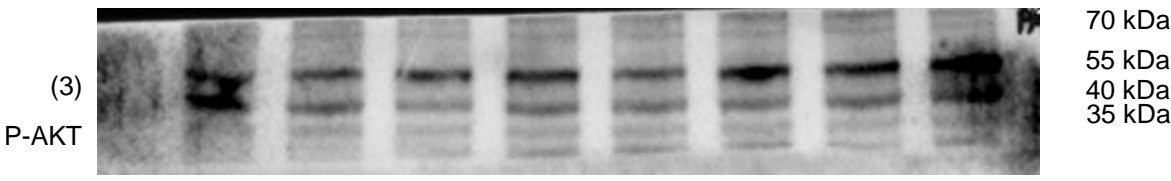

**Figure 4C**

Control      5 $\mu$ M Daidzein      10 $\mu$ M Daidzein  
                 15min 30min 60min      15min 30min 60min

EGFR

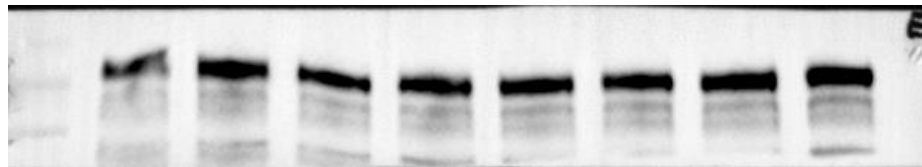

180 kDa  
130 kDa  
100 kDa

AKT

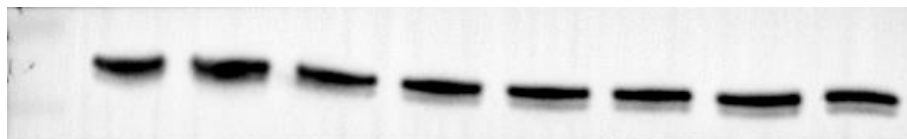

70 kDa  
55 kDa  
40 kDa

**Figure 4A**

Control      5 $\mu$ M Daidzein      10 $\mu$ M Daidzein  
                 15min 30min 60min      15min 30min 60min

(1)

GAPDH

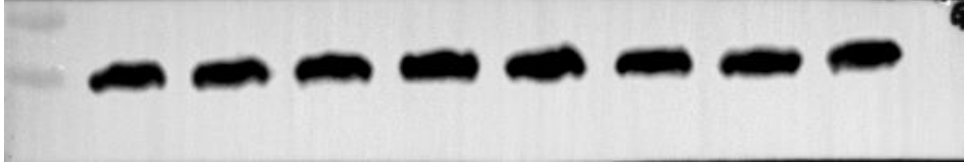

40 kDa

35 kDa

(2)

GAPDH

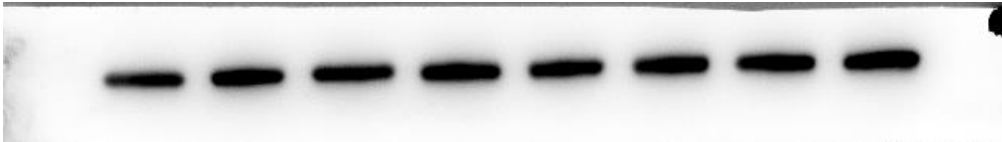

40 kDa

35 kDa

(3)

GAPDH

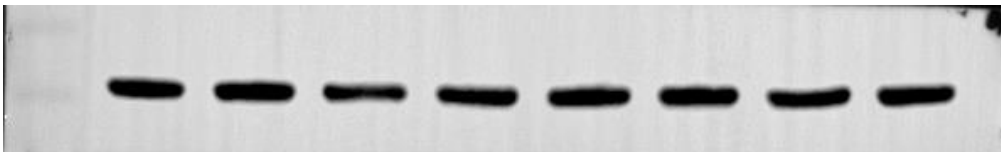

40 kDa

35 kDa

**Figure 4A**

Control      5 $\mu$ M Daidzein      10 $\mu$ M Daidzein  
                 15min 30min 60min      15min 30min 60min

(1)

GAPDH



40 kDa

35 kDa

(2)

GAPDH



40 kDa

35 kDa

(3)

GAPDH



40 kDa

35 kDa

**Figure 4C**

10 $\mu$ M Daidzein

0 $\mu$ M    15min    30min    60min

(1)

P-PI3K

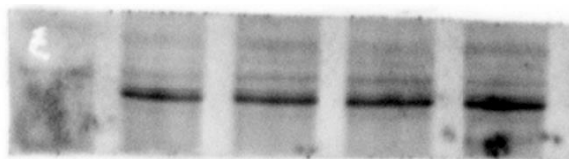

130 kDa

100 kDa

70 kDa

(2)

P-PI3K

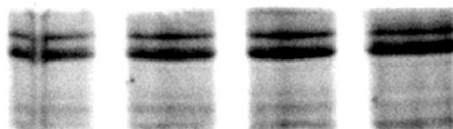

100 kDa

70 kDa

(3)

P-PI3K

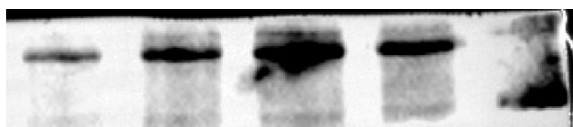

100 kDa

70 kDa

**Figure 4C**

10 $\mu$ M Daidzein

0 $\mu$ M    15min    30min    60min

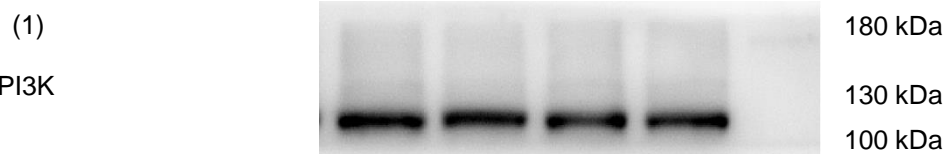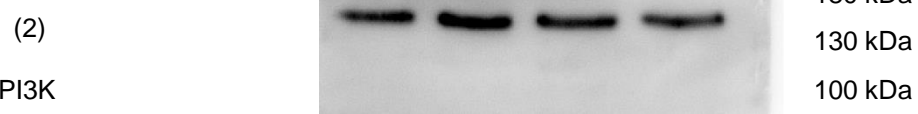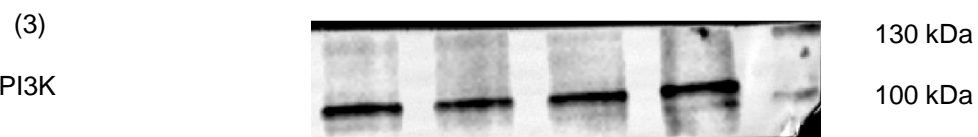

**Figure 4C**

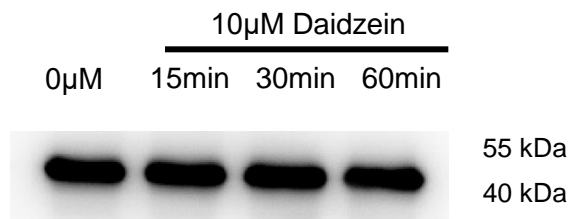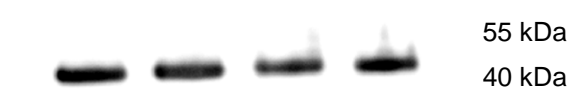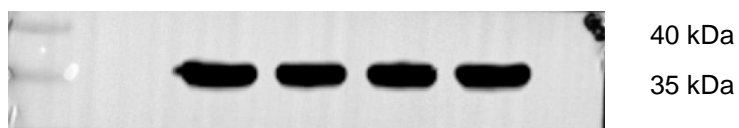



**Figure 5E**

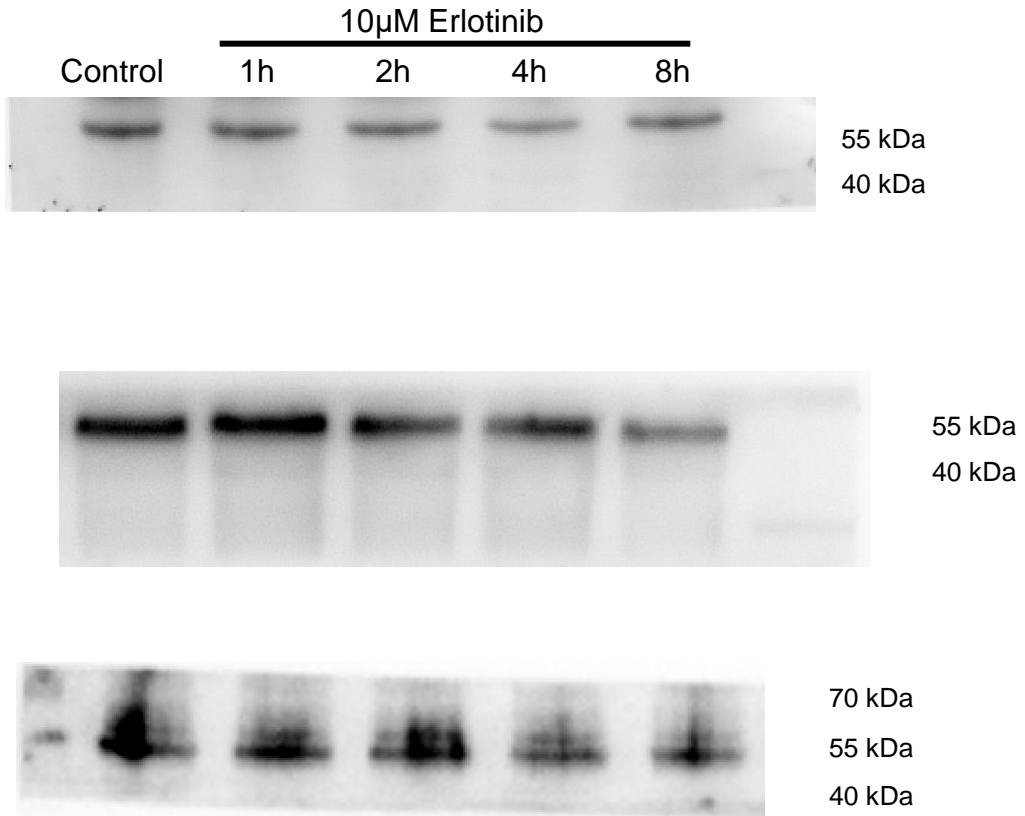

**Figure 5E**

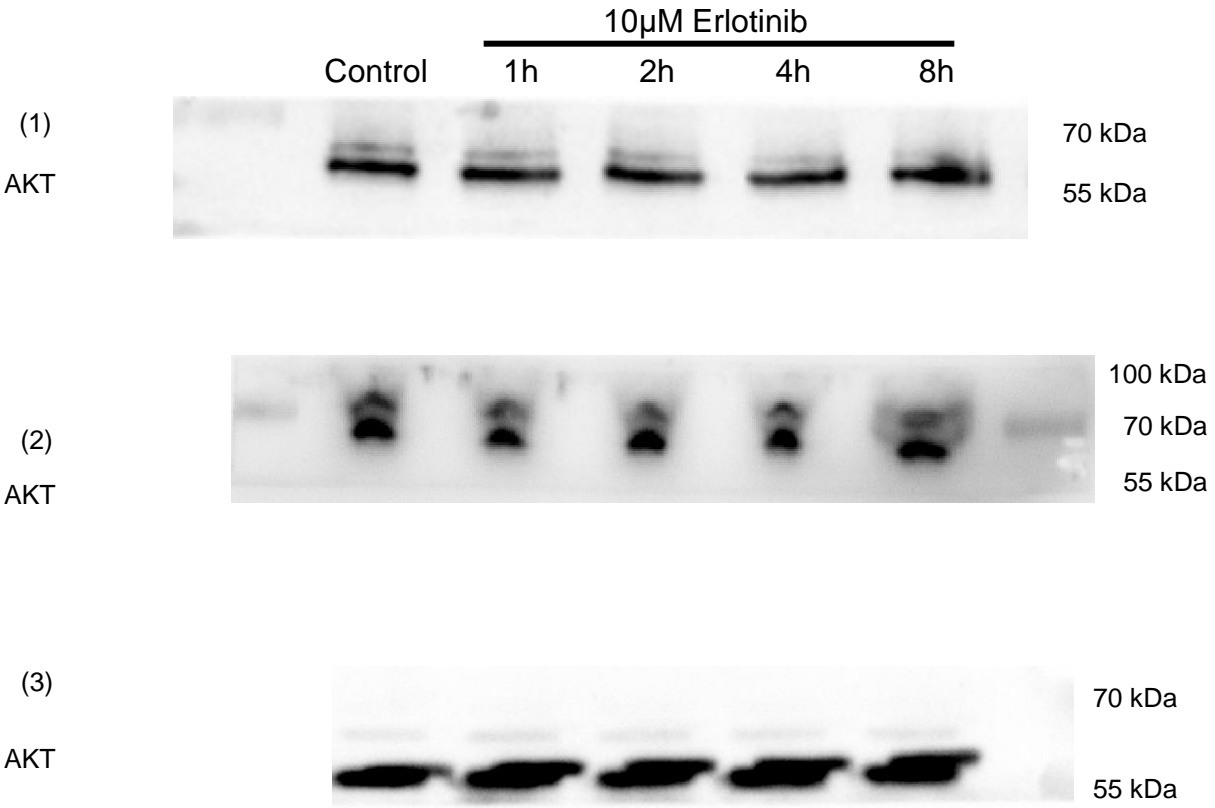

**Figure 5E**

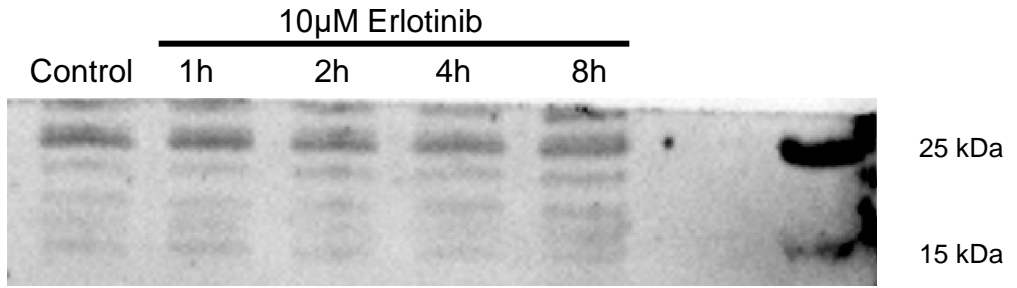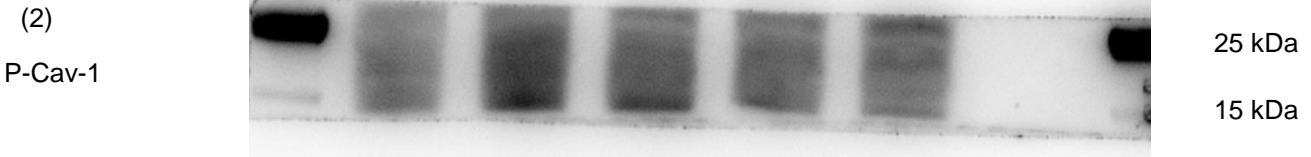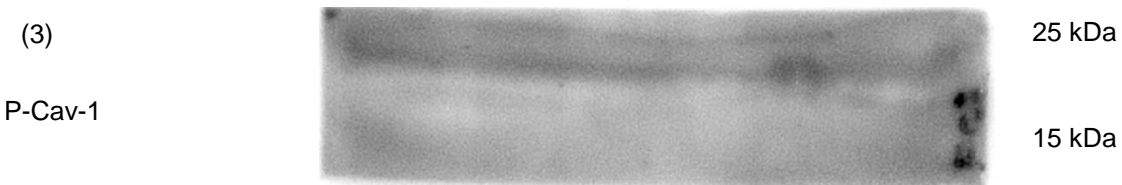

**Figure 5E**

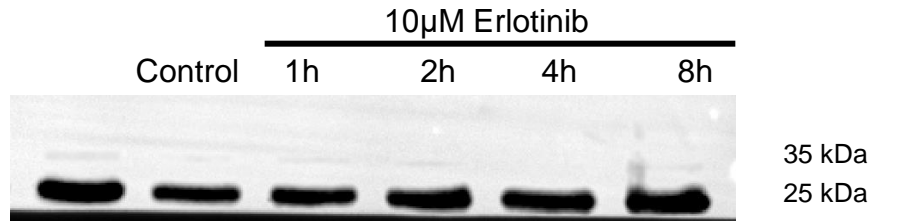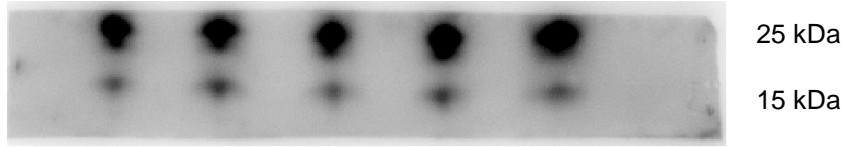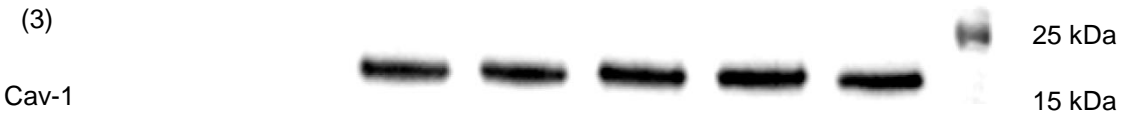

**Figure 5E**

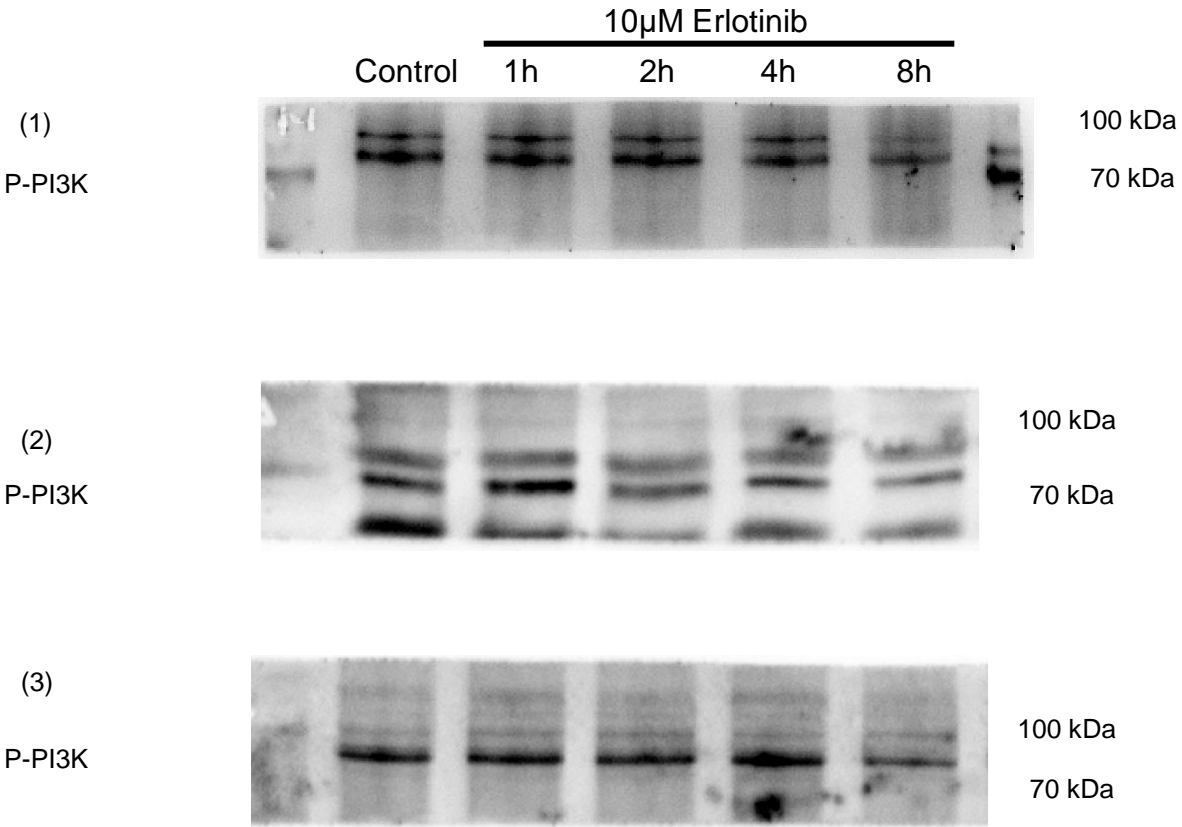

**Figure 5E**

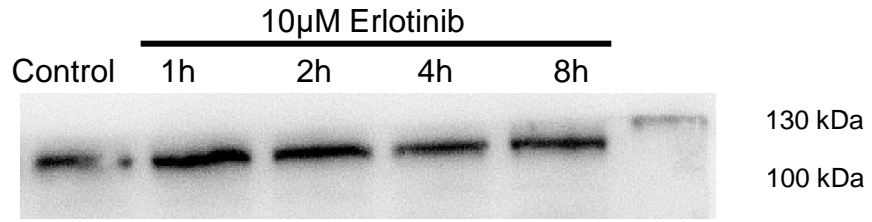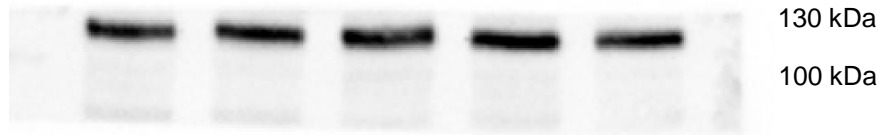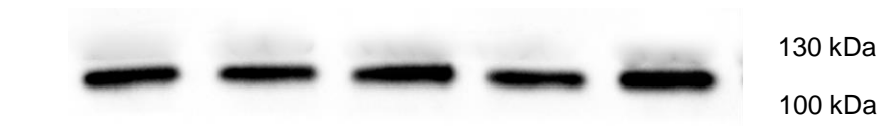

**Figure 5E**

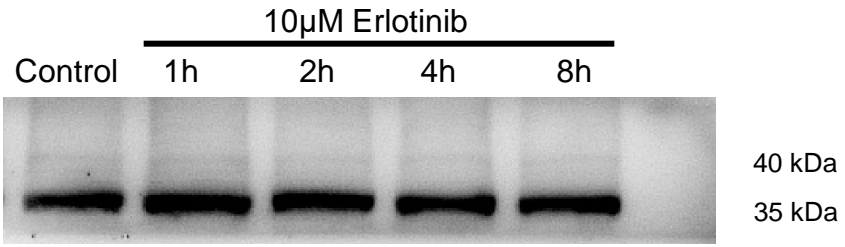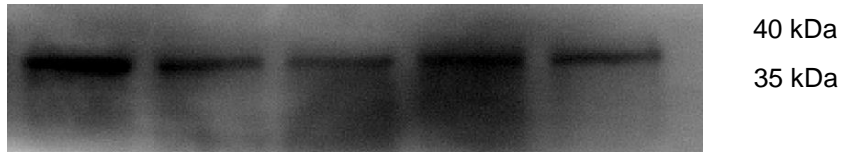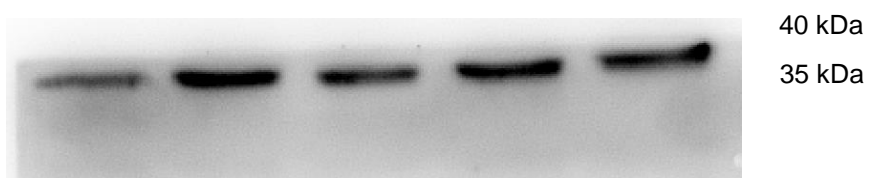

Supplement: WBFigs45.pdf [file WBFigs45.pdf]
