# Supplementary material for: Daidzein alleviates osteoporosis by promoting osteogenesis and angiogenesis coupling
Source: PeerJ journal article supplement (doi:10.7717/peerj.16121), 2023-10-16
Supplement: Raw_data.zip [file Raw_data.zip]

## Sheet: Sheet1
Fig.1B
	BV/TV				BMD				Tb.N				Tb.Th				Tb.Sp				Tb.Pf
sham	OVX+vehicle	OVX+Daidzein		sham	OVX+vehicle	OVX+Daidzein		sham	OVX+vehicle	OVX+Daidzein		sham	OVX+vehicle	OVX+Daidzein		sham	OVX+vehicle	OVX+Daidzein		sham	OVX+vehicle	OVX+Daidzein
8.59861	3.45024	4.95486		70.3429	45.7974	64.956		2.88961	1.3799	1.82389		0.02976	0.025	0.02717		0.31631	0.69969	0.52111		7.03577	13.343	12.4254
7.67517	3.44567	4.74809		66.8428	45.778	53.3796		2.52472	1.29967	1.79468		0.0304	0.02651	0.02646		0.36568	0.74291	0.53075		8.4049	14.583	10.78
7.22885	1.69555	5.9212		64.9608	32.4437	59.2945		2.56917	0.75653	1.93548		0.02814	0.02241	0.03059		0.36109	1.29941	0.48608		10.5845	17.2944	10.0359
7.53372	3.63109	5.28263		66.2575	47.0069	56.1592		2.65236	1.26345	1.91481		0.0284	0.02874	0.02759		0.34862	0.76274	0.49466		10.0311	13.382	10.7361
7.5592	3.48091	4.95476		66.3969	46.019	54.5281		2.47739	1.35311	1.8936		0.03051	0.02573	0.02617		0.37314	0.71331	0.50193		9.31573	13.9838	12.0908
6.80909	3.1972	6.2745		63.2012	44.1849	60.8437		2.44653	1.24224	2.3127		0.02783	0.02574	0.02713		0.38091	0.77926	0.40526		8.98295	14.1007	11.2966
Fig.1D
	No.of ob
sham	OVX+vehicle	OVX+Daidzein
105.249	24.477	98.3764
111.627	55.6717	88.0381
124.354	35.4209	72.2528
99.5388	34.5328	82.7527
Fig.1F
No.of Ocn+
sham	OVX+vehicle	OVX+Daidzein
25.0376	4.68892	22.3145
20.597	7.64179	17.1505
29.2494	9.78433	18.1505
24.5566	6.84519	15.7506
Fig.1H
osteoclast number/circumference of trabecular bone
sham	OVX+vehicle	OVX+Daidzein
6.1659	11.043	5.15925
3.8605	11.2662	7.31923
5.6419	14.5926	8.26125
13.8429	17.2117	6.27317
9.06145	18.6088	5.80541
12.895	24.0101	4.24425
