# Supplementary material for: Daidzein alleviates osteoporosis by promoting osteogenesis and angiogenesis coupling
Source: PeerJ journal article supplement (doi:10.7717/peerj.16121), 2023-10-16
Supplement: supplemental_file_supplement_raw_data.7z [file supplemental_file_supplement_raw_data.7z]

## Sheet: Sheet1
		Multiple sets of variables are consistent with homogeneity of variance.
			Sample size	Statistical method	Degree of freedom	Test statistic	Significance	Multiple comparisons	Group	Lower limit of 95% confidence interval	Significance
Immunofluorescence	Figure5H	Ki67+EMCN	12	ANOVA	2	14.249	0.002	LSD	sham/OVX+vehicle	-5.6103	<0.001
									OVX+vehicle/OVX+daidzein	-3.703	0.022
Western Blot	Figure3H	Angpt1	9	ANOVA	2	6.812	0.029	LSD	0min/30min	-0.3438	0.654
									0min/60min	-0.6896	0.014
		p-VEGFR	9	ANOVA	2	8.444	0.018	LSD	0min/30min	-0.2506	0.648
									0min/60min	-0.5326	0.009
