# Supplementary material for: Daidzein alleviates osteoporosis by promoting osteogenesis and angiogenesis coupling
Source: PeerJ journal article supplement (doi:10.7717/peerj.16121), 2023-10-16

**Figure3G**

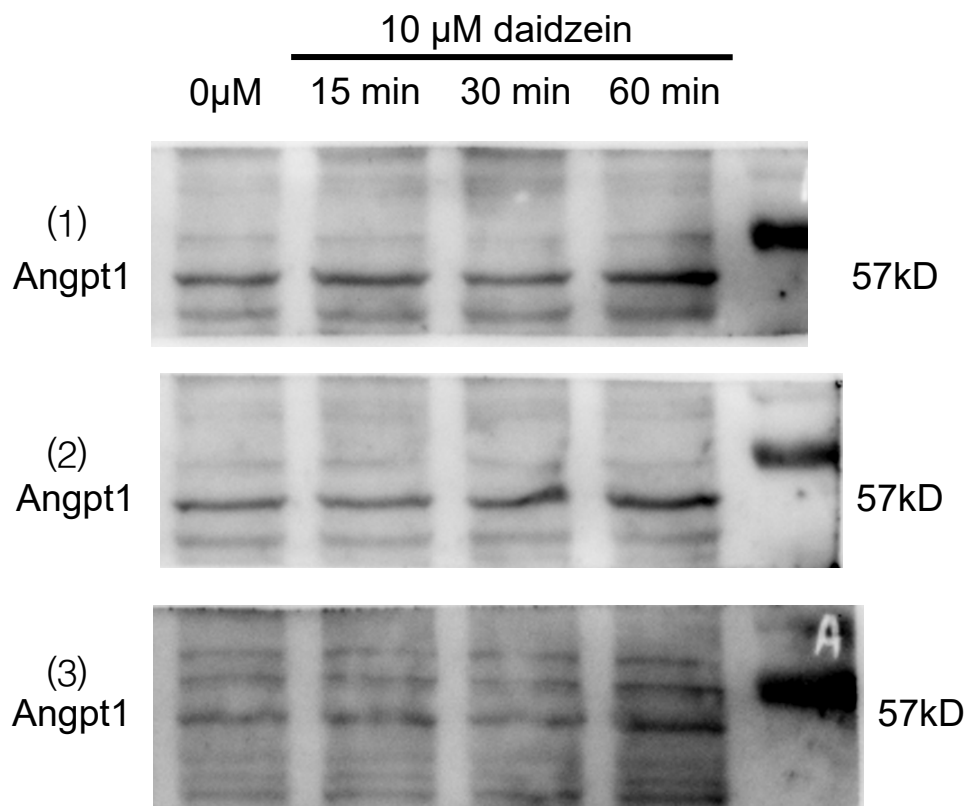

**Figure3G**

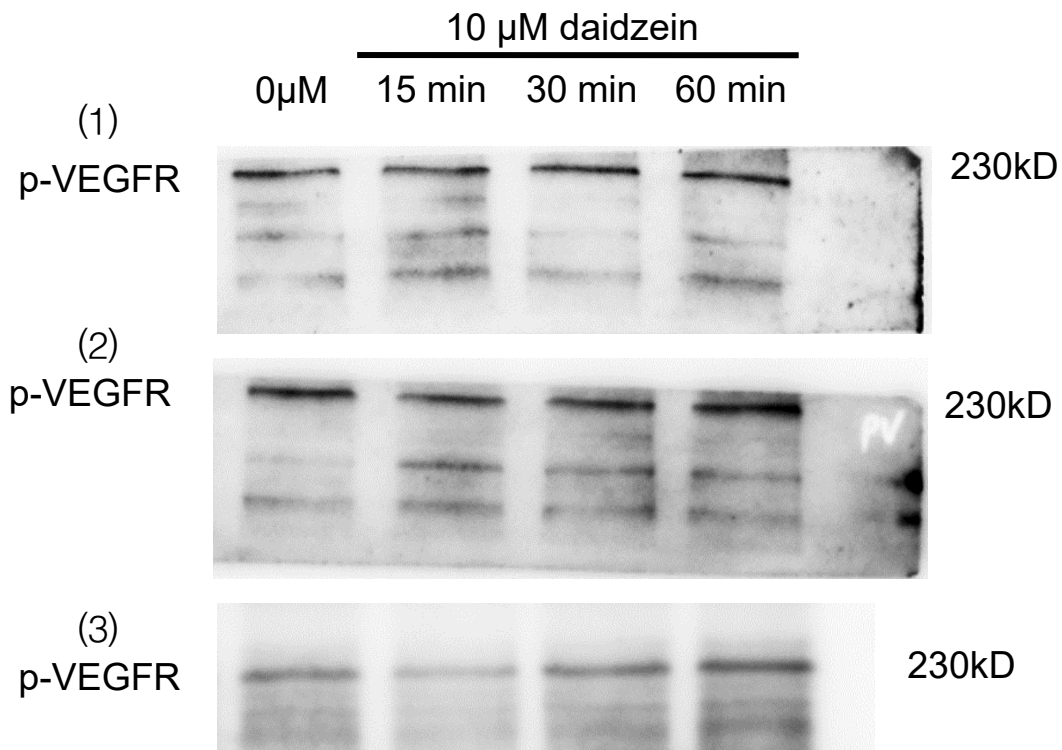



**Figure3G**

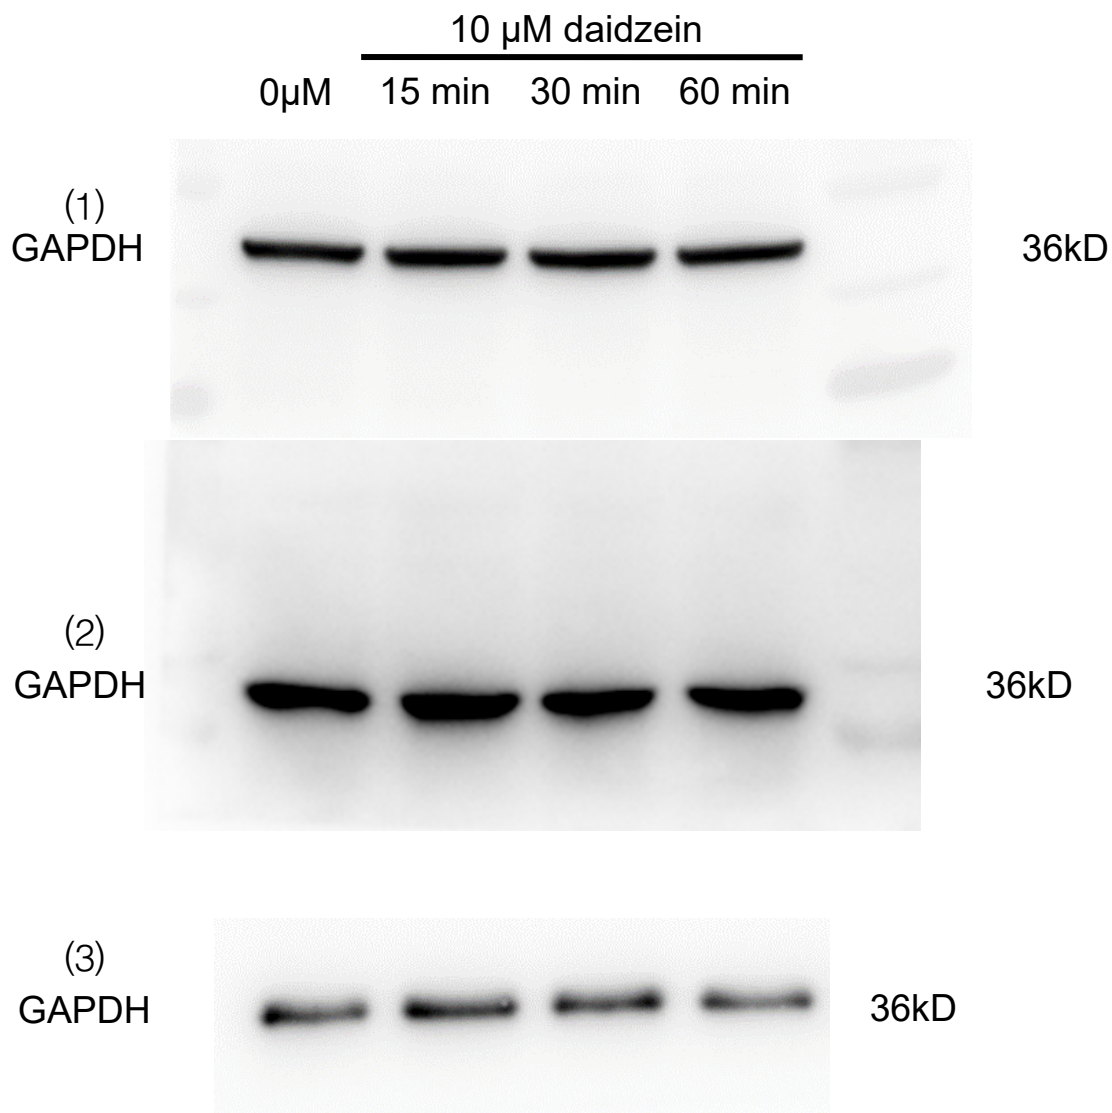

Supplement: WBFig3.pdf [file WBFig3.pdf]
